# Supplementary material
Source: publisher site journal article supplement (https://www.dovepress.com/get_supplementary_file.php?f=425202.docx)
Supplement: Supplementary file 1 [file get_supplementary_file.php]

***Supplementary information***

Supplementary information S1: Description of variables based on questions from BOLD core questionnaire.

***Smoking Status:***

*Have you ever smoked cigarettes?*

*How old were you when you first started regular cigarette smoking?*

*If you have stopped smoking, how old were you when you last stopped?*

*On average over the entire time that you smoke(d), about how many cigarettes per day do (did) you smoke?*

***Symptoms:*** based on presence or absence of symptom(s)

Cough

*Do you usually cough when you don't have a cold?*

*Do you cough on most days for as much as three months each year?*

Phlegm

*Do you usually bring up phlegm from your chest, or do you usually have phlegm in your chest that is difficult to bring up when you don't have a cold?*

*Do you bring up phlegm on most days for as much as three months each year?*

Wheezing/whistling

*Have you had wheezing or whistling in your chest at any time in the last 12
 months?*

*In the last 12 months, have you ever had an attack of wheezing or whistling that has made you feel short of breath?*

Breathlessness

*Are you troubled by shortness of breath when hurrying on the level or walking up a slight hill?*

*Do you have to walk slower than people of your age on level ground because of shortness of breath?*

*Do you ever have to stop for breath when walking at your own pace on level ground?*

*Do you ever have to stop for breath after walking about 100 yards (or after a few minutes) on level ground?*

*Are you too short of breath to leave the house or short of breath on dressing or undressing?*

***Exacerbation risk:***

*Have you ever had a period when you had breathing problems that got so bad that they interfered with your usual daily activities?*

*For how many of these episodes did you need to see a doctor in the past 12*

*months?*

*For how many of these episodes did you get hospitalized in the past 12 months?*

***Self-reported clinical diagnosis of current Asthma:***

*Has a doctor or other health care provider ever told you that you have asthma, asthmatic bronchitis or allergic bronchitis?*

*Do you still have asthma, asthmatic bronchitis or allergic bronchitis?*

Figures S1


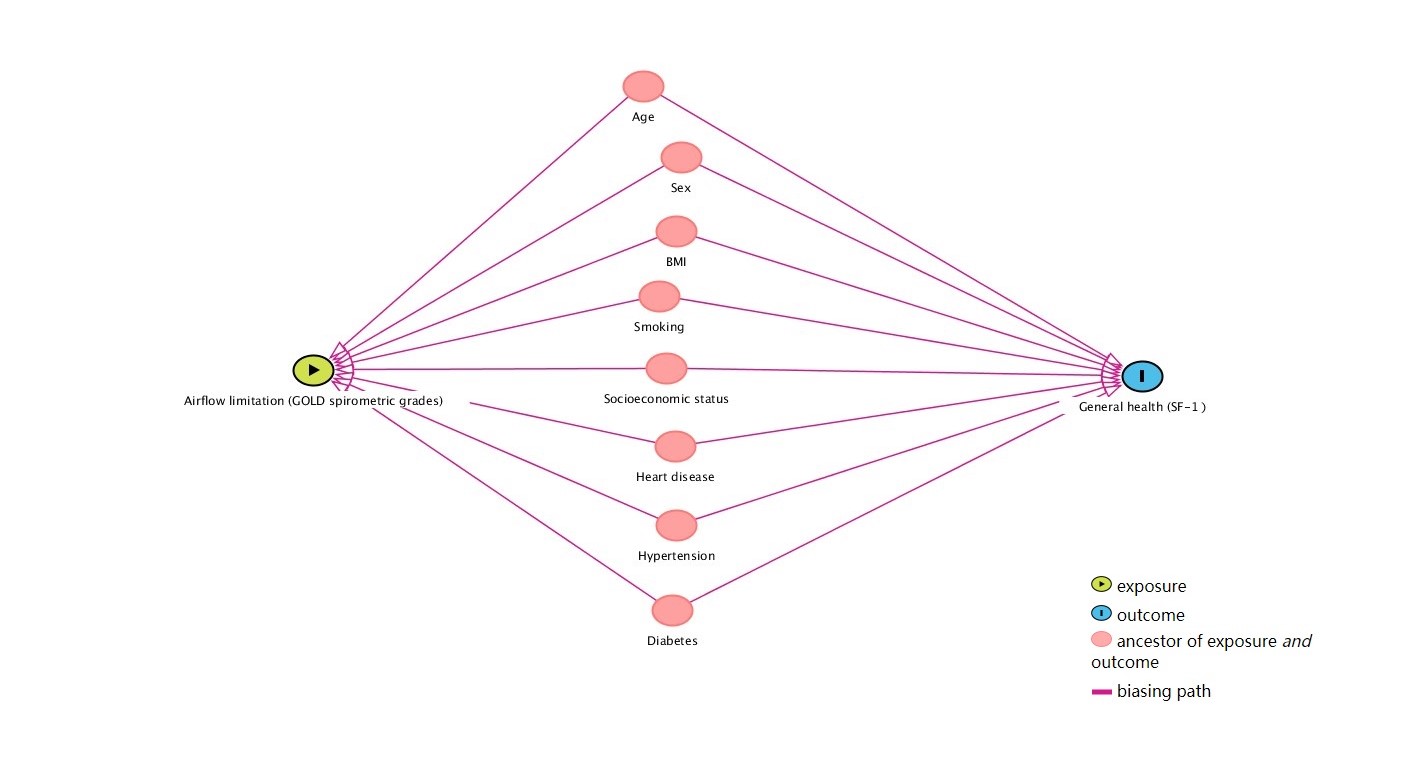


Directed Acyclic Graph (DAG) showing association between airflow limitation and general health (defined by SF-1)

Figures S2


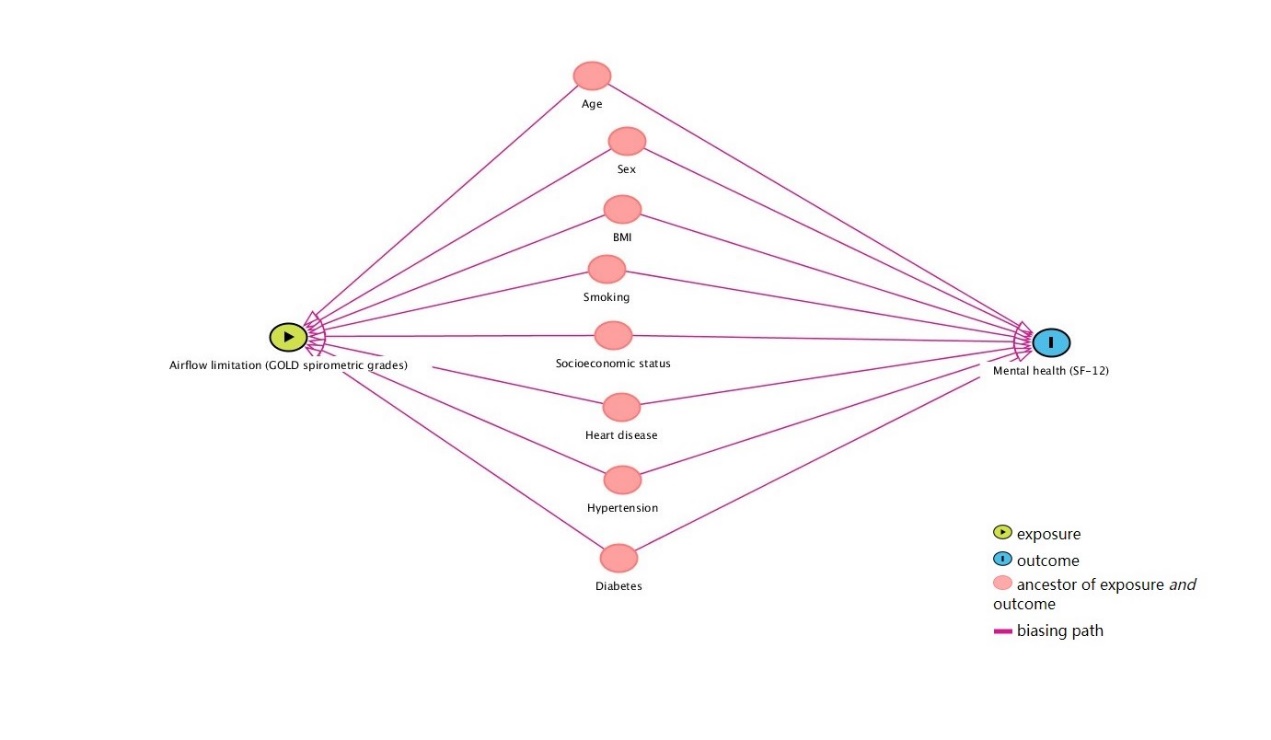


Directed Acyclic Graph (DAG) showing association between airflow limitation and mental health (defined by SF-12)

Figures S3


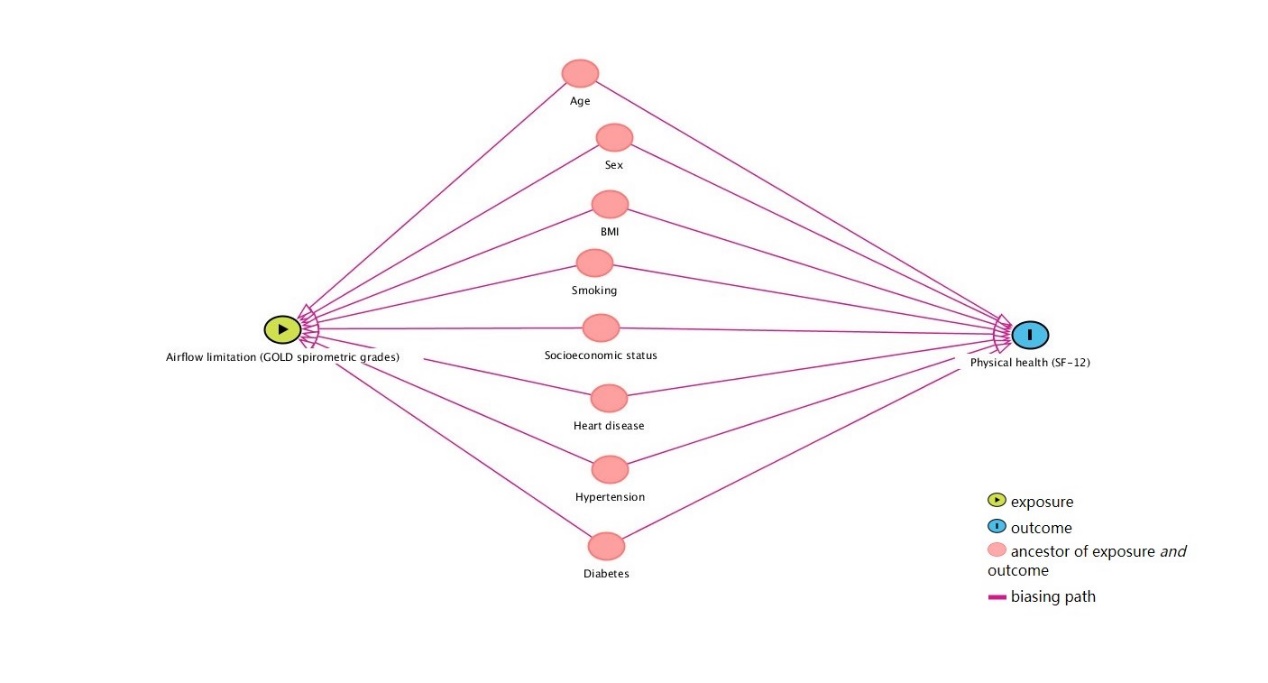


Directed Acyclic Graph (DAG) showing association between airflow limitation and physical health (defined by SF-12)
